# Supplementary material for: Mass Spectrometry Chromatography-Based Metabolomics: The Effect of Long-Term Aerobic Exercise on Learning Ability and the Metabolism of Intestinal Contents in Mice with Alzheimer’s Disease
Source: MDPI journal article supplement (doi:10.3390/metabo13111150), 2023-11-14
Supplement: s1 [file s1]

## Supplemental Information

**Table S1.** Metabolic differentials in the AE/AM group.

| Categories                      | No. | Metabolites                                                          | AE/AM                 |        |       |         |
|---------------------------------|-----|----------------------------------------------------------------------|-----------------------|--------|-------|---------|
|                                 |     |                                                                      | log <sub>2</sub> (FC) | m/z    | VIP   | p value |
| Lipids and lipid-like molecules | 1   | LysoPC(22:5(7Z,10Z,13Z,16Z,19Z))                                     | 0.57                  | 552.35 | 2.17  | 0.05    |
|                                 | 2   | PE(14:0/22:2(13Z,16Z))                                               | 0.89                  | 761.58 | 2.23  | 0.02    |
|                                 | 3   | PE(18:3(9Z,12Z,15Z)/18:0)                                            | 0.83                  | 742.53 | 1.6   | <0.01   |
|                                 | 4   | PI(O-16:0/20:1(11Z))                                                 | -1.04                 | 895.59 | 4.76  | <0.01   |
|                                 | 5   | PC(20:1(9Z)/0:0)                                                     | 0.86                  | 572.37 | 1.75  | 0.01    |
|                                 | 6   | PA(P-16:0/17:2(9Z,12Z))                                              | 1.32                  | 665.45 | 2.49  | 0.01    |
|                                 | 7   | PS(O-20:0/22:0)                                                      | 1.46                  | 844.68 | 2.47  | 0.01    |
|                                 | 8   | PG(O-20:0/14:0)                                                      | -1.21                 | 781.56 | 2.42  | 0.02    |
|                                 | 9   | LysoPE(16:1(9Z)/0:0)                                                 | 1.82                  | 452.28 | 2.19  | 0.05    |
|                                 | 10  | PA(20:4(5Z,8Z,11Z,14Z)/15:0)                                         | 1.63                  | 665.45 | 1.52  | 0.02    |
|                                 | 11  | PA(15:0/20:5(5Z,8Z,11Z,14Z,17Z))                                     | 2.49                  | 681.45 | 2.06  | 0.01    |
|                                 | 12  | PA(18:4(6Z,9Z,12Z,15Z)/21:0)                                         | -1.62                 | 756.56 | 1.82  | <0.01   |
|                                 | 13  | PE(P-18:1(9Z)/22:6(4Z,7Z,10Z,13Z,16Z,19Z))                           | 3.53                  | 791.57 | 1.81  | 0.02    |
|                                 | 14  | PE(P-18:0/22:6(4Z,7Z,10Z,12E,16Z,19Z)(14OH))                         | 3.63                  | 809.58 | 1.73  | 0.01    |
|                                 | 15  | 1-(2-methoxy-7Z,21Z-octacosadienyl)-sn-glycero-3-phosphoethanolamine | 2.34                  | 656.46 | 1.71  | 0.01    |
|                                 | 16  | PG(16:0/18:0)                                                        | -1.81                 | 795.54 | 1.66  | 0.04    |
|                                 | 17  | PS(17:1(9Z)/22:2(13Z,16Z))                                           | 1.07                  | 810.56 | 1.59  | <0.01   |
|                                 | 18  | PS(14:1(9Z)/16:1(9Z))                                                | 1.98                  | 686.44 | 1.54  | 0.03    |
|                                 | 19  | PA(P-18:0/17:2(9Z,12Z))                                              | 2.06                  | 709.46 | 1.52  | 0.02    |
|                                 | 20  | 13(S)-HODE                                                           | -0.66                 | 295.23 | 3.26  | 0.04    |
|                                 | 21  | cis-gondoic acid                                                     | -1.47                 | 309.28 | 3.72  | 0.04    |
|                                 | 22  | xi-10-Hydroxyoctadecanoic acid                                       | -0.97                 | 299.26 | 14.26 | 0.03    |
|                                 | 23  | 12-Hydroxy-12-octadecanoylcarnitine                                  | -0.28                 | 466.35 | 1.59  | 0.01    |
|                                 | 24  | 16-hydroxy stearic acid                                              | -0.98                 | 283.26 | 4.55  | 0.03    |
|                                 | 25  | Dehydrofalcarnone                                                    | 0.83                  | 498.34 | 3.13  | 0.01    |
|                                 | 26  | 6-[3]-ladderane-1-hexanol                                            | -1.7                  | 263.24 | 2.97  | <0.01   |

|    |                                                                                                                                      |       |        |       |       |
|----|--------------------------------------------------------------------------------------------------------------------------------------|-------|--------|-------|-------|
| 27 | 11-hydroperoxy-12,13-epoxy-9-octadecenoic acid                                                                                       | 1.25  | 346.26 | 2.9   | 0.05  |
| 28 | 2-(9R-(5Z,9Z-tetracosadienoyloxy)-3-methyl-2Z-decenoyloxy)-ethanesulfonic acid                                                       | 2.57  | 672.46 | 2.59  | 0.01  |
| 29 | 13-Heptadecyn-1-ol                                                                                                                   | -1.95 | 253.25 | 2.57  | <0.01 |
| 30 | Annohexocin                                                                                                                          | 1.96  | 651.44 | 2.24  | 0.01  |
| 31 | Tetranor-5-NO <sub>2</sub> -CLA                                                                                                      | 2.87  | 252.16 | 2.2   | 0.01  |
| 32 | 4,8 dimethylnonanoyl carnitine                                                                                                       | 1.44  | 330.26 | 1.9   | <0.01 |
| 33 | DG(18:3n6/0:0/20:4n6)                                                                                                                | 1.28  | 656.52 | 1.56  | <0.01 |
| 34 | Citronellyl trans-2-methyl-2-butenolate                                                                                              | 0.78  | 219.18 | 1.55  | 0.01  |
| 35 | 5beta-Cyprinolsulfate                                                                                                                | -0.56 | 513.29 | 3.54  | 0.02  |
| 36 | 5beta-scymnol sulfate                                                                                                                | -0.64 | 547.29 | 1.96  | 0.04  |
| 37 | Proscillaridin A                                                                                                                     | -0.66 | 548.32 | 5.84  | <0.01 |
| 38 | Tauro-b-muricholic acid                                                                                                              | -0.61 | 514.28 | 4.83  | 0.02  |
| 39 | (6RS,24R)-24,25-dihydroxyvitamin D3 6,19-sulfur dioxide adduct / (6RS,24R)-24,25-dihydroxycholecalciferol 6,19-sulfur dioxide adduct | 0.55  | 498.32 | 2     | 0.05  |
| 40 | 7-Sulfocholic acid                                                                                                                   | -1.26 | 487.24 | 34.63 | 0.03  |
| 41 | Cortolone-3-glucuronide                                                                                                              | -2.26 | 581.23 | 12.93 | <0.01 |
| 42 | Homodolicholide                                                                                                                      | -0.61 | 473.32 | 1.61  | 0.05  |
| 43 | Chenodeoxycholic acid sulfate                                                                                                        | -1.7  | 471.24 | 9.03  | 0.03  |
| 44 | Physapubenolide                                                                                                                      | -0.56 | 546.31 | 6.36  | <0.01 |
| 45 | 23S,25,26-Trihydroxyvitamin D3                                                                                                       | -0.58 | 450.36 | 5.89  | <0.01 |
| 46 | Physapubescin                                                                                                                        | -0.59 | 548.32 | 3.9   | 0.01  |
| 47 | 7alpha-Hydroxy-3-oxo-5beta-cholan-24-oic acid                                                                                        | -0.54 | 435.27 | 3.11  | 0.03  |
| 48 | Physagulin F                                                                                                                         | -0.71 | 543.26 | 3     | 0.02  |
| 49 | Corchoroside B                                                                                                                       | -0.94 | 499.27 | 2.76  | <0.01 |
| 50 | dolichyl diphosphate                                                                                                                 | -0.79 | 501.25 | 2.09  | <0.01 |
| 51 | Phorbol                                                                                                                              | -0.7  | 409.19 | 2.38  | 0.01  |
| 52 | 7,12-Dihydroxy-3,11,15,23-tetraoxolanost-8-en-26-oic acid                                                                            | -0.77 | 529.28 | 11.92 | <0.01 |
| 53 | Ganoderic acid theta                                                                                                                 | -0.66 | 529.28 | 6.14  | <0.01 |
| 54 | Ganoderic acid N                                                                                                                     | -0.55 | 511.27 | 1.96  | 0.02  |
| 55 | (-)-Euphomine A                                                                                                                      | -0.51 | 532.33 | 2.65  | 0.04  |
| 56 | Pisumoside B                                                                                                                         | -1.3  | 675.32 | 2.09  | 0.01  |

|                                           |    |                                                                                      |       |        |       |      |
|-------------------------------------------|----|--------------------------------------------------------------------------------------|-------|--------|-------|------|
|                                           | 57 | N-3,7-Dimethyl-2,6-octadienylcyclopropylcarboxamide                                  | 0.57  | 481.32 | 1.88  | 0.03 |
|                                           | 58 | 4,5-(methanoxyethano)isolongifol-4-ene                                               | 0.84  | 278.25 | 1.77  | 0.05 |
|                                           | 59 | DG(18:3(9Z,12Z,15Z)/24:0/0:0)                                                        | 0.84  | 741.58 | 3.11  | 0.00 |
|                                           | 60 | 2-(8-[5]-ladderane-octanyl)-sn-glycerol                                              | -1.54 | 385.27 | 2.05  | 0.00 |
|                                           | 61 | MGDG(18:3(9Z,12Z,15Z)/16:3(7Z,10Z,13Z))                                              | 0.97  | 764.53 | 1.73  | 0.01 |
|                                           | 62 | Cerasinone                                                                           | -1.40 | 329.10 | 2.80  | 0.04 |
|                                           | 63 | Neolinderatone                                                                       | 0.82  | 511.32 | 2.21  | 0.01 |
|                                           | 64 | Kuhlmanniquinol                                                                      | -0.43 | 334.16 | 1.51  | 0.00 |
|                                           | 65 | 4-Hydroxy-5,7,4'-trimethoxyflavan                                                    | -0.43 | 315.12 | 1.51  | 0.01 |
|                                           | 66 | PI-Cer(d20:0/16:0)                                                                   | 0.61  | 810.58 | 3.31  | 0.00 |
|                                           | 67 | PI-Cer(t18:0/18:0(2OH))                                                              | 0.80  | 824.57 | 1.76  | 0.03 |
|                                           | 68 | MG(0:0/20:5(5Z,8Z,11Z,14Z,17Z)/0:0)                                                  | -0.43 | 421.26 | 1.74  | 0.02 |
| Benzenoids                                | 69 | Phenylacetylglycine                                                                  | -0.72 | 385.14 | 1.98  | 0.05 |
|                                           | 70 | N-Ethylacetamide                                                                     | 0.6   | 88.08  | 2.14  | 0    |
|                                           | 71 | Aspartyl-Tryptophan                                                                  | -2.62 | 656.27 | 1.85  | 0    |
| Homogeneous non-metal compounds           | 72 | Peroxynitrite                                                                        | 0.8   | 61.99  | 10.56 | 0    |
| Hydrocarbons                              | 73 | 7-Ethyl-3,6-dihydro-1,4-dimethylazulene                                              | 0.54  | 411.24 | 2.41  | 0.04 |
| Lignans, neolignans and related compounds | 74 | Enterolactone                                                                        | -0.62 | 299.13 | 2.44  | 0.04 |
| Organic acids and derivatives             | 75 | Phenylacetylglycine                                                                  | -0.72 | 385.14 | 2.28  | 0.01 |
|                                           | 76 | N-Ethylacetamide                                                                     | 0.6   | 88.08  | 4.12  | 0.01 |
|                                           | 77 | Aspartyl-Tryptophan                                                                  | -2.62 | 656.27 | 2.98  | 0    |
| Organic compounds                         | 78 | Bilirubin                                                                            | -2.53 | 583.25 | 7.49  | 0    |
| Organic nitrogen compounds                | 79 | Diethanolamine                                                                       | 0.75  | 88.08  | 1.95  | 0.01 |
|                                           | 80 | Phytosphingosine                                                                     | -1.6  | 318.3  | 2.6   | 0    |
| Organic oxygen compounds                  | 81 | (±)-(Z)-2-(5-Tetradecenyl)cyclobutanone                                              | -0.98 | 265.25 | 1.67  | 0.02 |
| Organoheterocyclic compounds              | 82 | D-Urobilinogen                                                                       | 1.04  | 589.3  | 2     | 0.01 |
|                                           | 83 | Pentoxifylline                                                                       | -2.14 | 557.28 | 1.73  | 0    |
|                                           | 84 | Alosetron                                                                            | -0.54 | 589.3  | 2.04  | 0    |
|                                           | 85 | 5,8-dihydroxy-2-(1-hydroxy-3-methoxy-4-oxocyclohexyl)-3,7-dimethoxy-4H-chromen-4-one | -0.88 | 425.11 | 1.97  | 0.03 |

|                                  |    |                                                                                                                                                                                                                                                           |       |        |      |      |
|----------------------------------|----|-----------------------------------------------------------------------------------------------------------------------------------------------------------------------------------------------------------------------------------------------------------|-------|--------|------|------|
|                                  | 86 | 2-Oxindole-3-acetate                                                                                                                                                                                                                                      | -1    | 381.11 | 1.5  | 0.03 |
|                                  | 87 | Licoricidin                                                                                                                                                                                                                                               | -1.82 | 469.22 | 1.65 | 0.03 |
| Phenylpropanoids and polyketides | 88 | (4-{2-[(1R,16Z,24E,26E,28Z)-1,18-dihydroxy-19,30-dimethoxy-15,17,21,23,29,35-hexamethyl-2,3,10,14,20-pentaoxo-11,36-dioxo-4-azatricyclo[30.3.1.0 <sup>4,9</sup> ]hexatriaconta-16,24,26,28-tetraen-12-yl]propyl}-2-methoxycyclohexyl)oxidanesulfonic acid | -1.99 | 992.51 | 9.27 | 0.03 |
|                                  | 89 | (2Z)-2-[(3hydroxyphenyl)methylidene] octanoic acid                                                                                                                                                                                                        | -1.47 | 495.28 | 1.58 | 0.03 |
| Alkaloids and derivatives        | 90 | Homoarecoline                                                                                                                                                                                                                                             | 1.13  | 339.23 | 1.95 | 0.02 |
|                                  | 91 | cis-9,10-Epoxy stearic acid                                                                                                                                                                                                                               | -1.63 | 299.26 | 16.9 | 0    |
|                                  | 92 | 5-NITRO-2-PHENYLPROPYLAMINO BENZOIC ACID [NPPB]                                                                                                                                                                                                           | -2.63 | 283.11 | 4.36 | 0    |
|                                  | 93 | 3-hexanoyl-NBD Cholesterol                                                                                                                                                                                                                                | 1.02  | 663.45 | 3.91 | 0.02 |
| Unclassified                     | 94 | 3 $\alpha$ ,6 $\alpha$ -Dihydroxy-7-oxo-5 $\beta$ -cholan-24-oic Acid                                                                                                                                                                                     | -0.75 | 407.28 | 3.35 | 0.05 |
|                                  | 95 | Polyporusterone A                                                                                                                                                                                                                                         | 0.61  | 479.34 | 3.29 | 0.05 |
|                                  | 96 | N-Acetyl-leu-leu-leu-leu-leu-tyr-amide                                                                                                                                                                                                                    | -2.94 | 788.53 | 2.6  | 0.01 |
|                                  | 97 | ApNA                                                                                                                                                                                                                                                      | 0.47  | 425.28 | 2.22 | 0.04 |
|                                  | 98 | Evobioside                                                                                                                                                                                                                                                | -5.2  | 683.36 | 1.82 | 0.04 |

Note: VIP: variable weight value, from the VIP value of the OPLS-DA model, the larger the VIP, the greater the contribution of the variable to the grouping; *p* value: the result of the t-test, used to evaluate whether the variables differ significantly between the two groups of samples, *p*<0.05 indicates significant; Log2(FC): the ratio of the mean expression of metabolites in the two groups of samples, a positive value indicates upregulation, a negative value indicates down-regulation.
